# Supplementary figures and images for: Dynamics of SARS-CoV-2 Major Genetic Lineages in Moscow in the Context of Vaccine Prophylaxis
Source: MDPI journal article supplement (doi:10.3390/ijms232314670), 2022-11-24

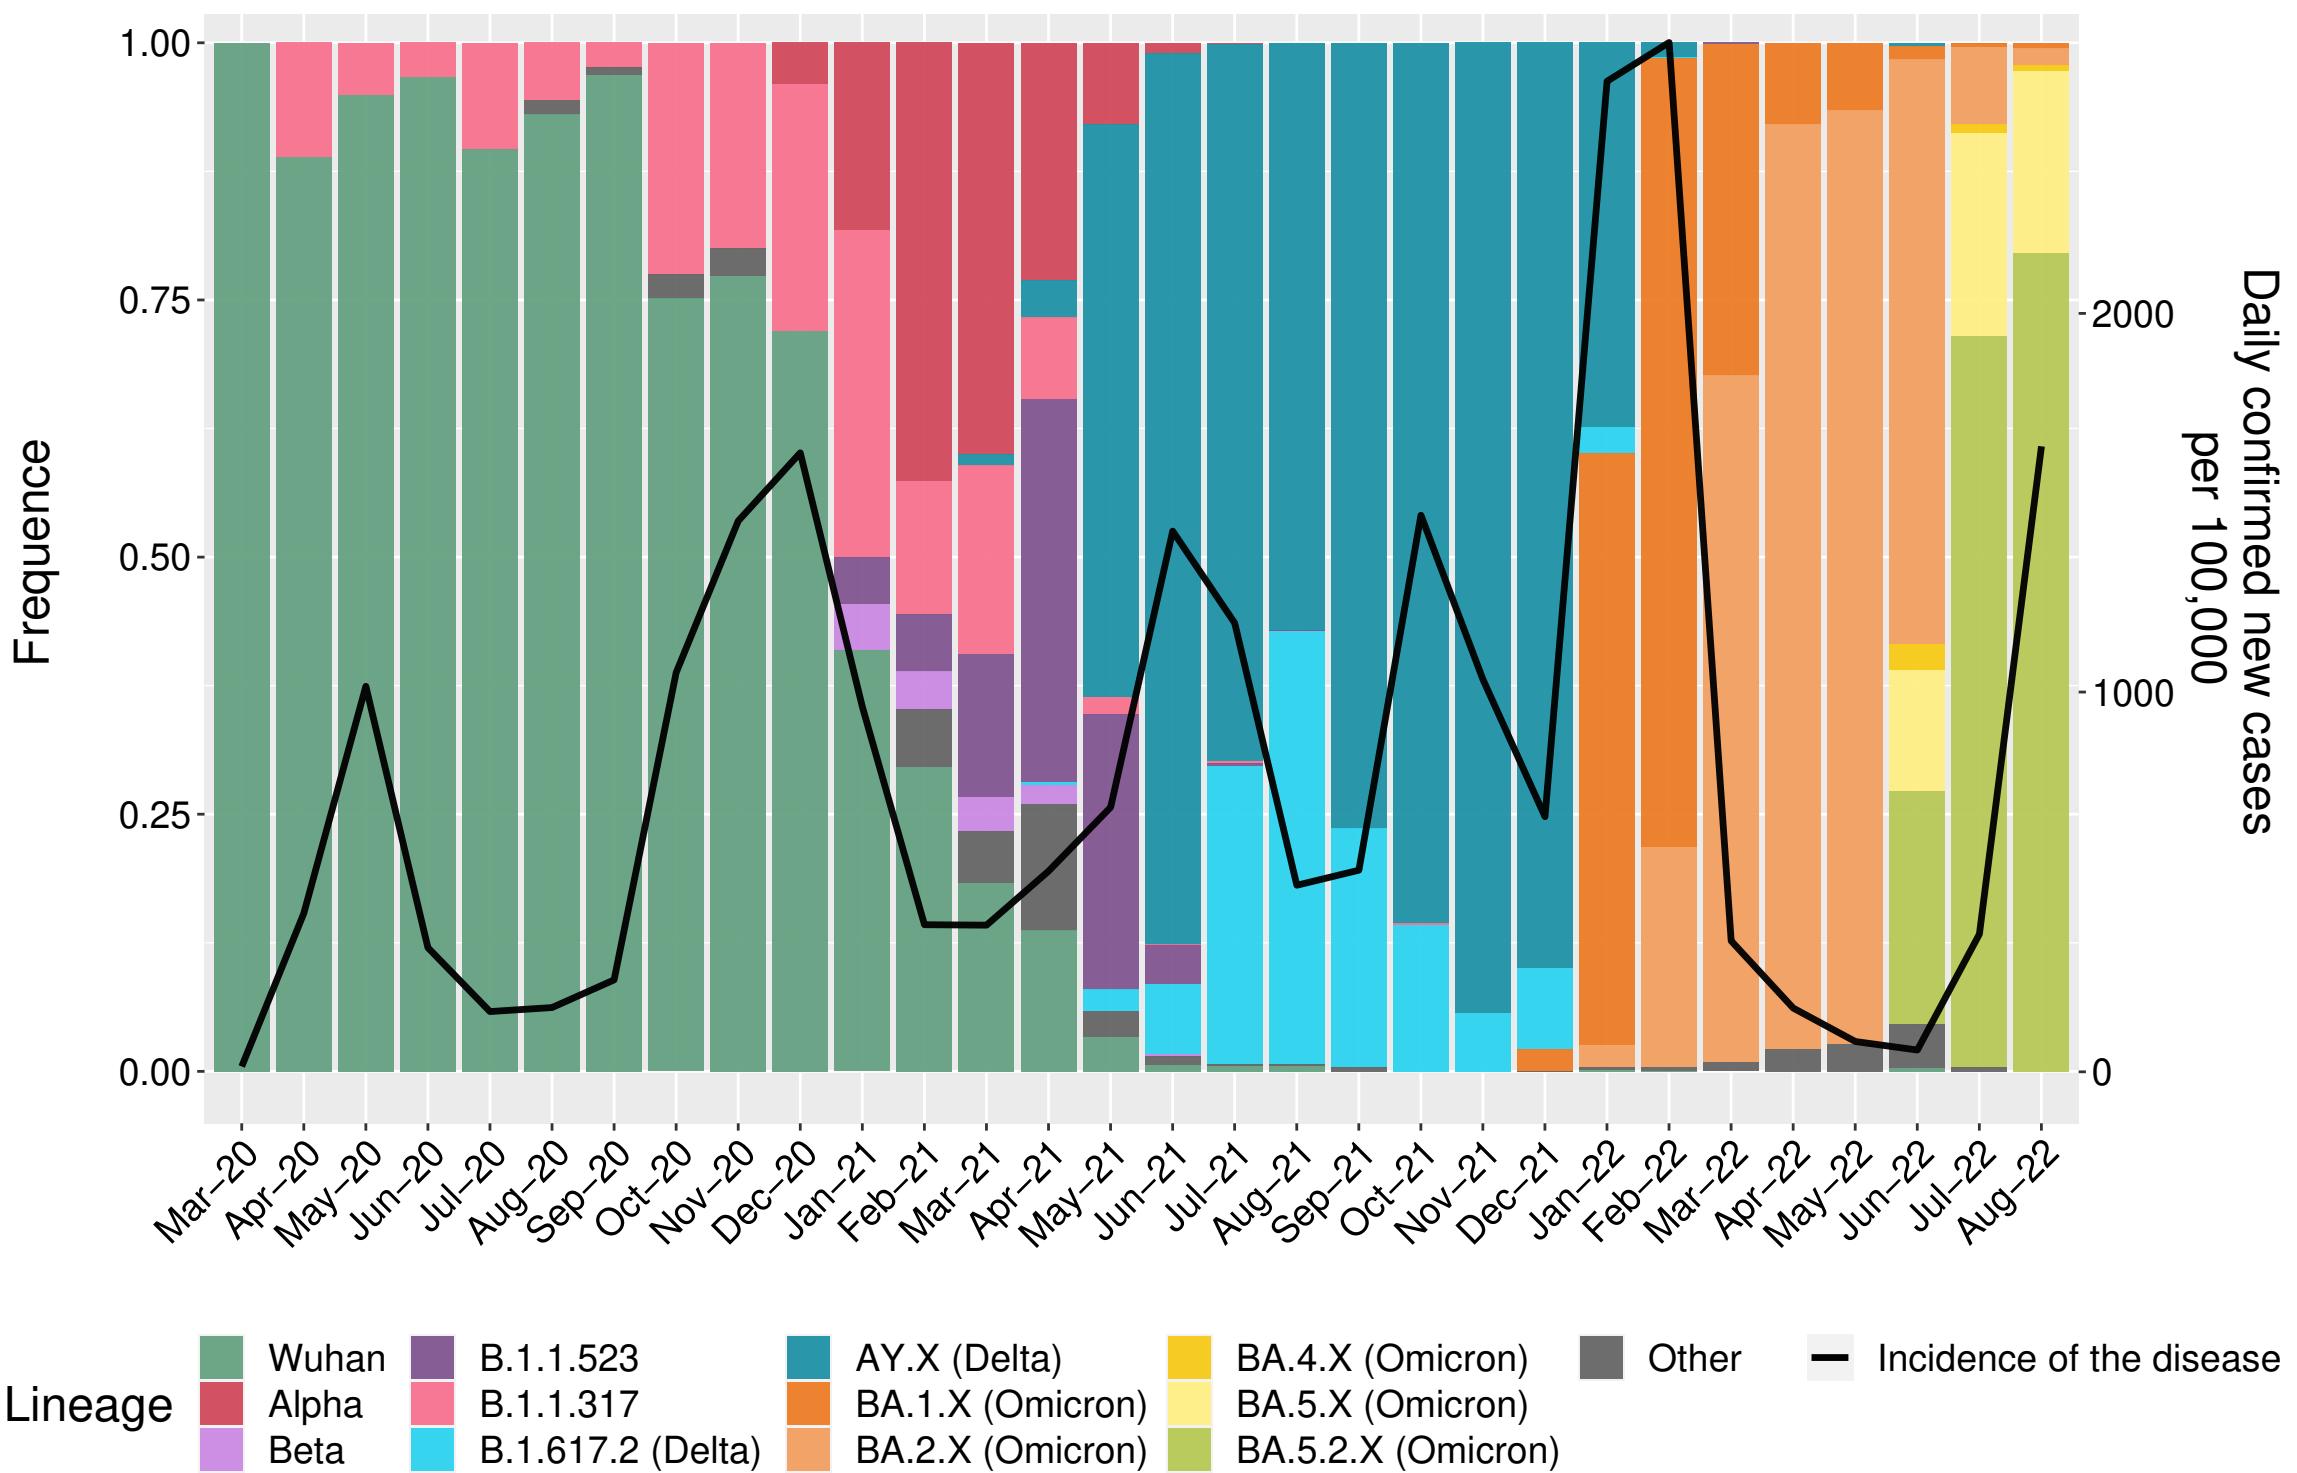

Supplement: s1 [file s1]

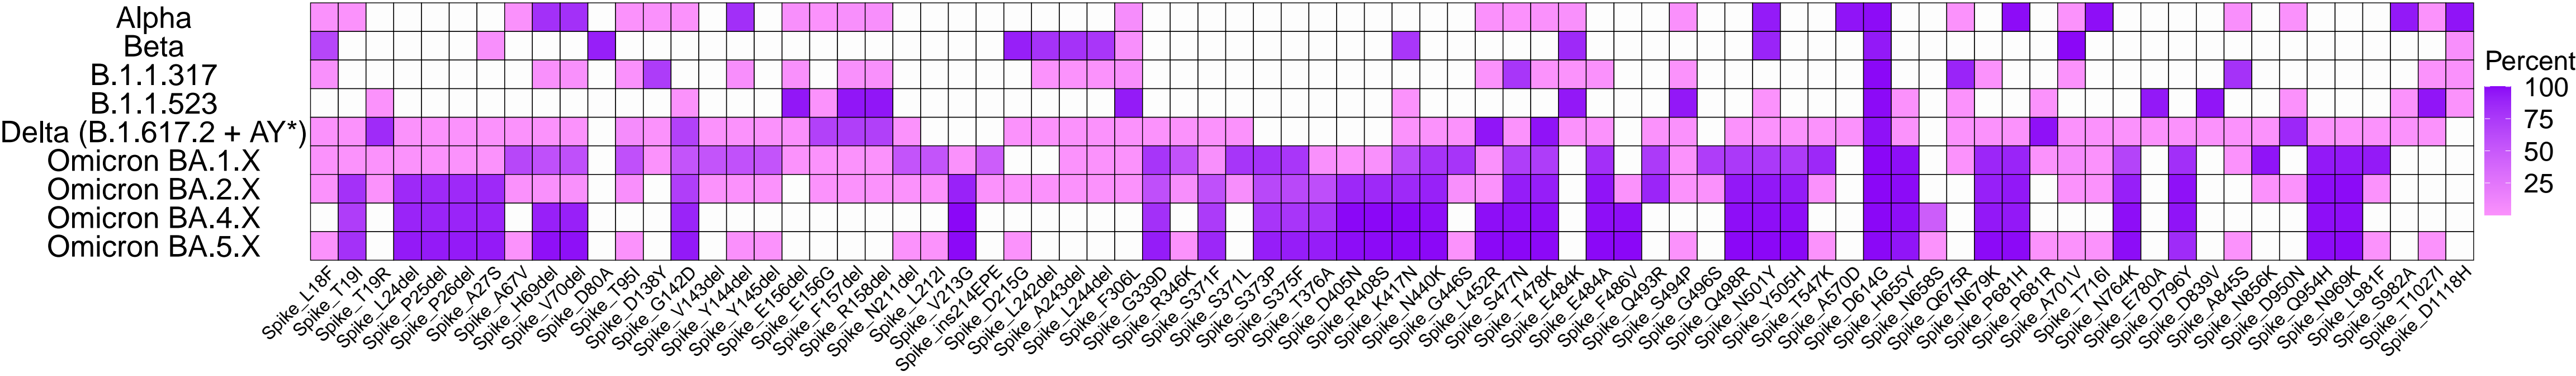

Supplement: s1 [file s1]
